# Supplementary material for: Prognostic Impact of High Baseline Stromal Tumor-Infiltrating Lymphocytes in the Absence of Pathologic Complete Response in Early-Stage Triple-Negative Breast Cancer
Source: MDPI journal article supplement (doi:10.3390/cancers14051323), 2022-03-04
Supplement: s1 [file s1]

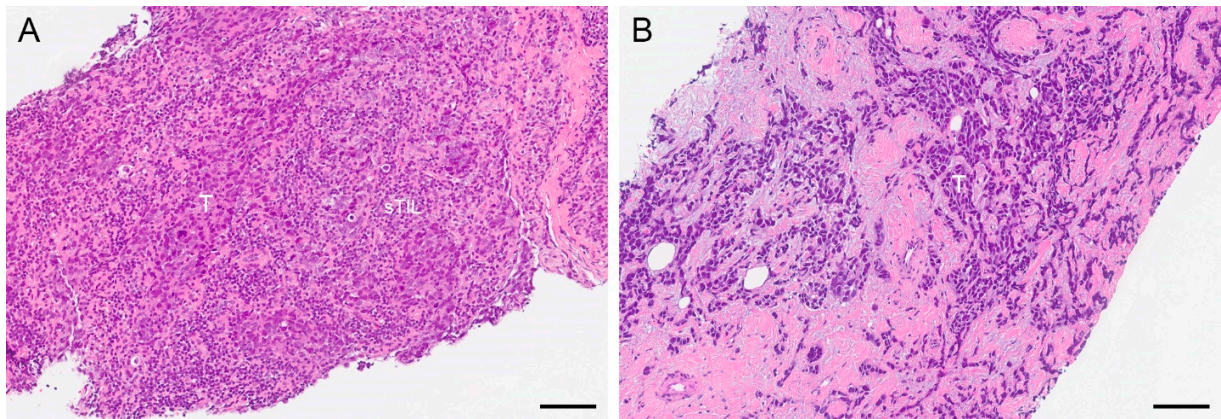

**Supplementary Figure S1.** Photomicrographs of high sTIL and low sTIL tumors. (A) A tumor with high sTIL. (B) A tumor with low sTIL. T, tumor. Scale bar, 100  $\mu\text{m}$ . sTIL, stromal tumor-infiltrating lymphocytes.

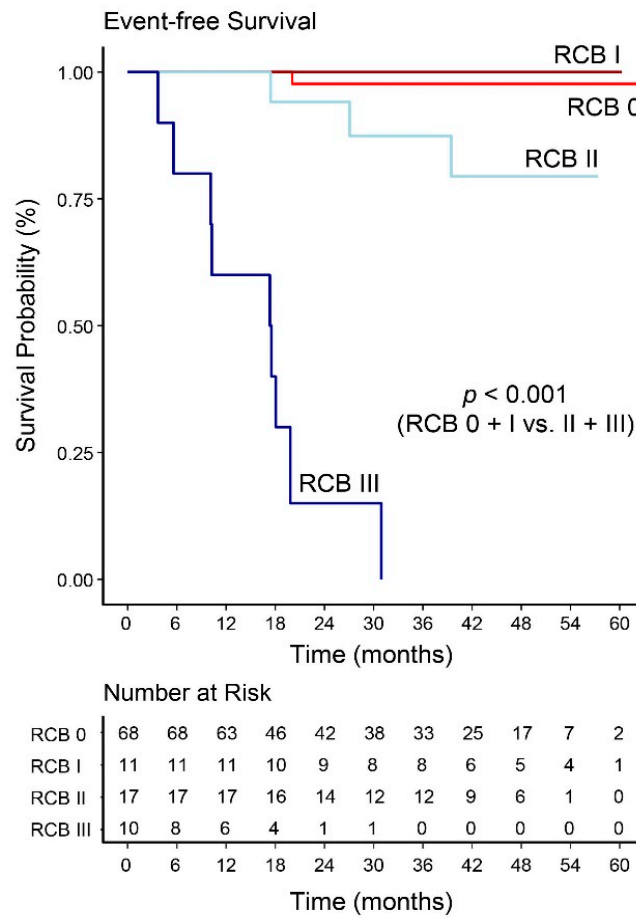

**Supplementary Figure S2.** Kaplan-Meier plots of event-free survival in high sTIL patients based on RCB groups.  
sTIL, stromal tumor-infiltrating lymphocytes. RCB, residual cancer burden.
